# Supplementary material for: Marked mucosal lipid shifts in treatment refractory inflammatory bowel disease: a lipidomic study
Source: Springer Nature journal article supplement (doi:10.1186/s12876-025-03944-6), 2025-05-20

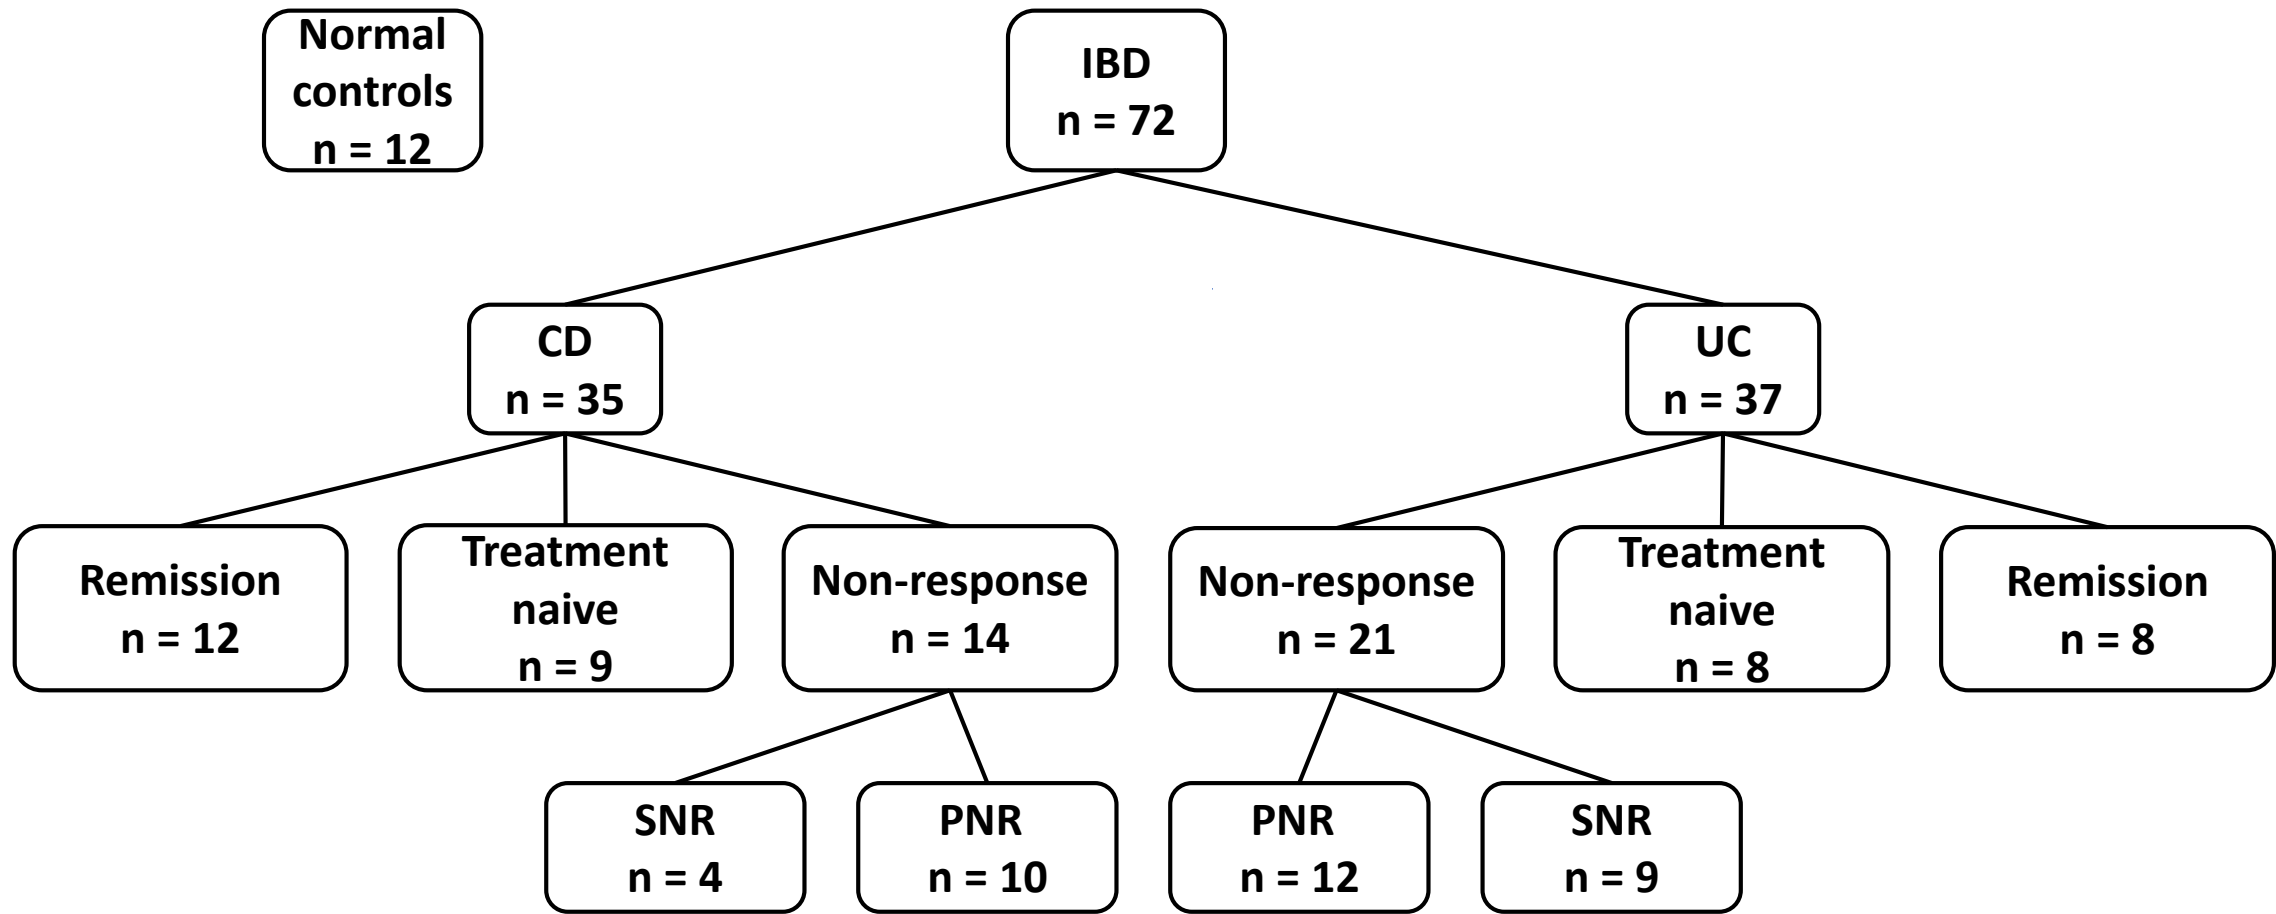

Supplement: MOESM1 [file 12876_2025_3944_MOESM1_ESM.pdf]
